# Supplementary material for: Integrated device for plasma separation and nucleic acid extraction from whole blood toward point-of-care detection of bloodborne pathogens
Source: Royal Society of Chemistry journal article supplement (doi:10.1039/d4lc00571f), 2024-01-01
Supplement: d4lc00571f1.pdf [file d4lc00571f1.pdf]

1  
2  
3  
4  
5  
6  
7  
8  
9  
10  
11  
12  
13  
14  
15  
16  
17

**SUPPLEMENTAL MATERIAL**

**Integrated device for plasma separation and nucleic acid extraction from whole blood  
toward point-of-care detection of bloodborne pathogens**

Abigail G. Ayers,<sup>†a</sup> Christia M. Victoriano,<sup>†a</sup> Samuel K. Sia<sup>\*a</sup>

<sup>a</sup>Department of Biomedical Engineering, Columbia University; New York, NY 10027, USA

<sup>\*</sup>Corresponding author. Email: [ss2735@columbia.edu](mailto:ss2735@columbia.edu)

<sup>†</sup>These authors contributed equally to this text.

18 **SUPPLEMENTAL TABLES**

19 **Supplemental Table 1.** Comparison of work demonstrating whole-blood magnetofluidic sample  
 20 processing for bloodborne viral disease detection. References indicated from main text.

| Work                                               | Bloodborne viral disease target | Power-free sample preparation                                                                   | Integrated sample preparation from <u>blood</u>                                                                                                                                           | Point-of-care-friendly sample collection & loading                                                   |
|----------------------------------------------------|---------------------------------|-------------------------------------------------------------------------------------------------|-------------------------------------------------------------------------------------------------------------------------------------------------------------------------------------------|------------------------------------------------------------------------------------------------------|
| Ngo et al., 2023 (ref. 8)                          | HIV                             | -                                                                                               | -                                                                                                                                                                                         | -                                                                                                    |
|                                                    |                                 | Arduino-controlled magnetic track                                                               | whole blood starting sample, a separate device for plasma separation; 3 min blood separation, ~27-min extraction, 15 min RT-PCR amplification on-device (total: ~45 min sample-to-result) | 100 µL starting volume, requires pipetting                                                           |
| Berry et al., 2014 (ref. 14)                       | HIV                             | +                                                                                               | -                                                                                                                                                                                         | -                                                                                                    |
|                                                    |                                 | manual placement and movement of a magnet under device                                          | serum starting sample, lysis/bead-binding done off-device; no blood separation, 5-10 min extraction + 50 min RT-PCR amplification off-device (total: ~1 hour sample-to-result)            | 100 to 500 µL starting volume, requires pipetting                                                    |
| Neto et al., 2017 (ref. 18)                        | HCV                             | -                                                                                               | -                                                                                                                                                                                         | -                                                                                                    |
|                                                    |                                 | computer-controlled magnetic track                                                              | plasma initial starting sample; blood separation off-chip, ~45 min nucleic acid extraction, ~72 min RT-PCR amplification on-device (total: ~117 min sample-to-result)                     | 200 µL starting volume, requires pipetting                                                           |
| Ayers/Victoriano et al., 2024 ( <i>this work</i> ) | HCV                             | +                                                                                               | +                                                                                                                                                                                         | +                                                                                                    |
|                                                    |                                 | power-free fixed magnetic track in device, manipulated manually by user but with guided control | whole blood starting sample, plasma separation from blood on-device; 2 min blood separation, 14 min extraction, 45 min RT-PCR (total: ~1 hour sample-to-result)                           | 50 µL fingerstick collection, Minivette POCT tool acts as sample collector and dispenser into device |

21

22

23 **SUPPLEMENTAL FIGURES**

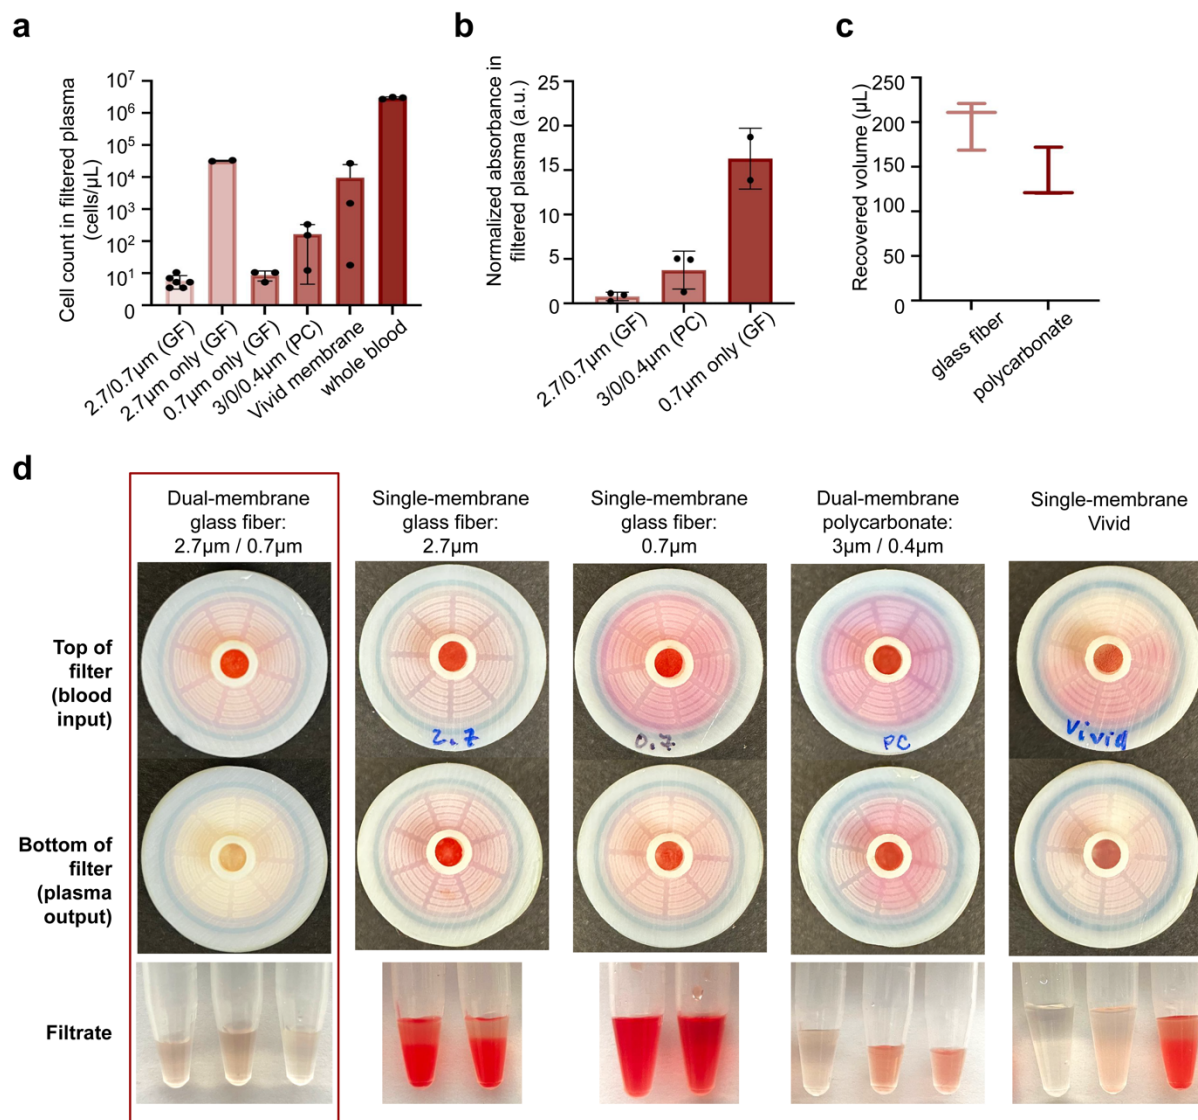

24  
 25 **Supplemental Figure 1. Plasma separation filter characterization: membrane selection.**  
 26 Plasma separation performance for filter with various combinations of single or dual membranes.  
 27 Dual membrane filtration with 2.7  $\mu\text{m}$  and 0.7  $\mu\text{m}$  pore size glass fiber membranes demonstrated  
 28 the highest filtration efficiency indicated by low cell counts remaining in filtered plasma, compared  
 29 to single glass fiber membranes, dual polycarbonate membranes (3.0  $\mu\text{m}$  and 0.4  $\mu\text{m}$ ), and the  
 30 Vivid plasma separation membrane. **(b)** Evaluation of hemolysis in plasma filtered by membranes  
 31 with various combinations of single or dual membranes. Dual membrane filtration with 2.7  $\mu\text{m}$  and  
 32 0.7  $\mu\text{m}$  pore size glass fiber membranes demonstrated the lowest degree of hemolysis, indicated  
 33 by low absorbance at 414 nm, compared to dual polycarbonate membranes and a single 0.7  $\mu\text{m}$   
 34 glass fiber membrane. **(c)** Recovered volume of plasma filtered by dual glass fiber (2.7  $\mu\text{m}$  and  
 35 0.7  $\mu\text{m}$ ) and polycarbonate membranes (3.0  $\mu\text{m}$  and 0.4  $\mu\text{m}$ ). The dual glass fiber design yielded  
 36 a higher average volume of 201.8  $\mu\text{L} \pm 18.75 \mu\text{L}$ , while filtration with dual polycarbonate  
 37 membranes resulted in 137.9  $\pm 24.13 \mu\text{L}$  of filtrate. **(d)** Images of filter input, output, and filtrate

38 for various combinations of dual and single membranes. Dual glass fiber membranes  
39 demonstrated high red blood cell filtration and low hemolysis, indicated by the red color at the  
40 filter input showing successful retention of red blood cells in the membranes with a clear yellow  
41 color at the output and filtrate. Single 2.7  $\mu\text{m}$  and Vivid membranes showed limited filtration,  
42 shown by the appearance of red blood cells in the filtrate. Dual polycarbonate membranes and  
43 single 0.7  $\mu\text{m}$  membranes resulted in higher hemolysis, indicated by the red tint in the filtrate and  
44 at the filter outputs.

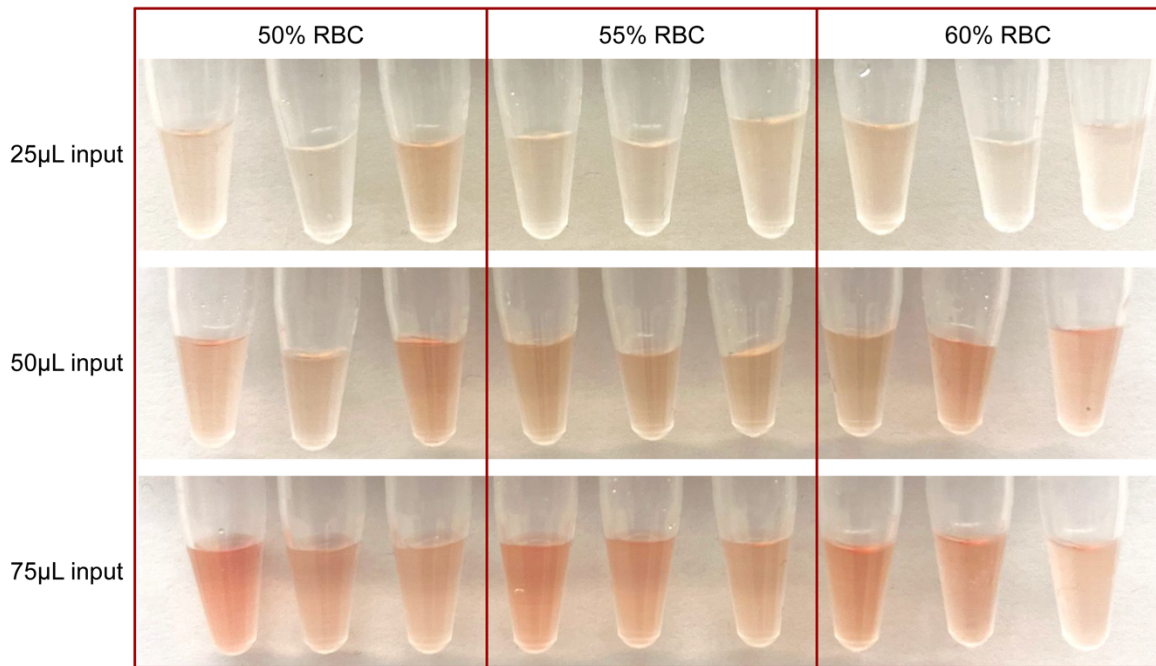

45  
46 **Supplemental Figure 2. Filtrate images at varying hematocrit and sample volume levels.**  
47 Images of resulting filtrate from filtration of blood at various hematocrit levels and input volumes  
48 in the filter. There is an observable trend in increasing hemolysis at higher input volumes, as  
49 indicated by visually darker filtrate with a red tint. Filtrate is visually consistent across hematocrit  
50 levels for the same volumes, quantified by no significant difference in hemolysis between  
51 hematocrit levels (Fig. 2i).

1 **Starting position:** upper and lower magnets away from first chamber (with magnetic beads) for initial lysis/binding incubation

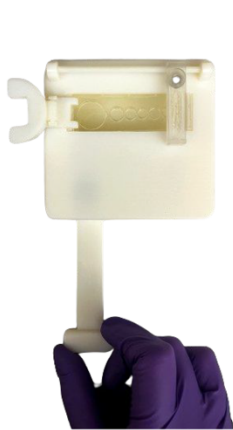

2 **Magnetic mixing:** lower magnet brought below first chamber to draw magnetic beads to bottom surface of chamber

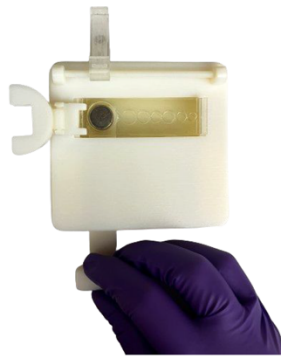

3 **Magnetic mixing:** upper magnet brought above first chamber to draw magnetic beads to top surface

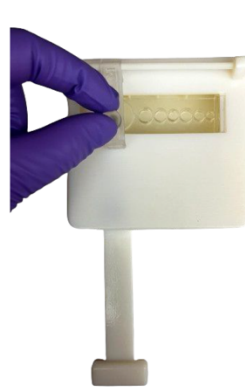

4 **Bead transfer:** lower magnet moved along track below chambers

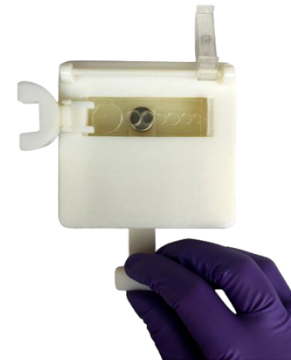

5 **Elution incubation:** upper and lower magnets away from final chamber

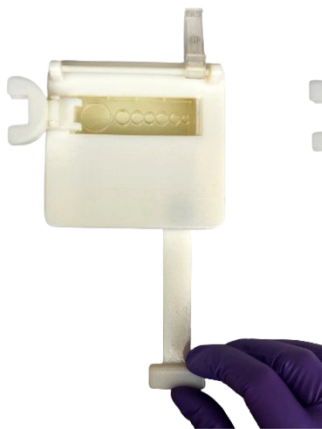

6 **Magnetic mixing:** lower magnet brought below final chamber to draw magnetic beads to bottom surface

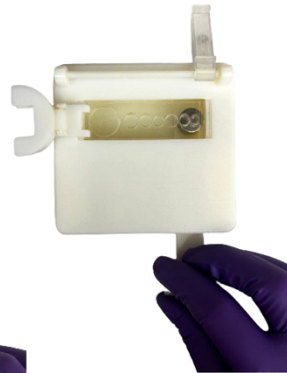

7 **Magnetic mixing:** upper magnet brought above final chamber to draw magnetic beads to top surface

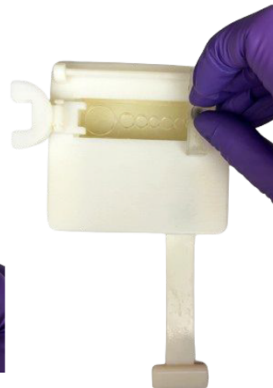

8 **Final position:** Lower magnet held at edge of final chamber to collect beads out of the way of eluate removal

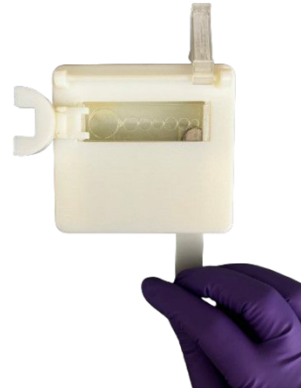

52  
53  
54  
55  
56  
57  
58

**Supplemental Figure 3. Power-free, manually operated guided magnetic track of PRECISE device.** Still images of all possible manual magnet movements by the user. The upper magnet moves vertically with respect to the extraction module to resuspend magnetic beads in the chamber, while the upper magnetic track moves horizontally to move the mixing magnet between the lysis/binding and elution chambers. The lower magnet moves vertically to draw and release magnetic beads and horizontally to transfer magnetic beads between chambers.

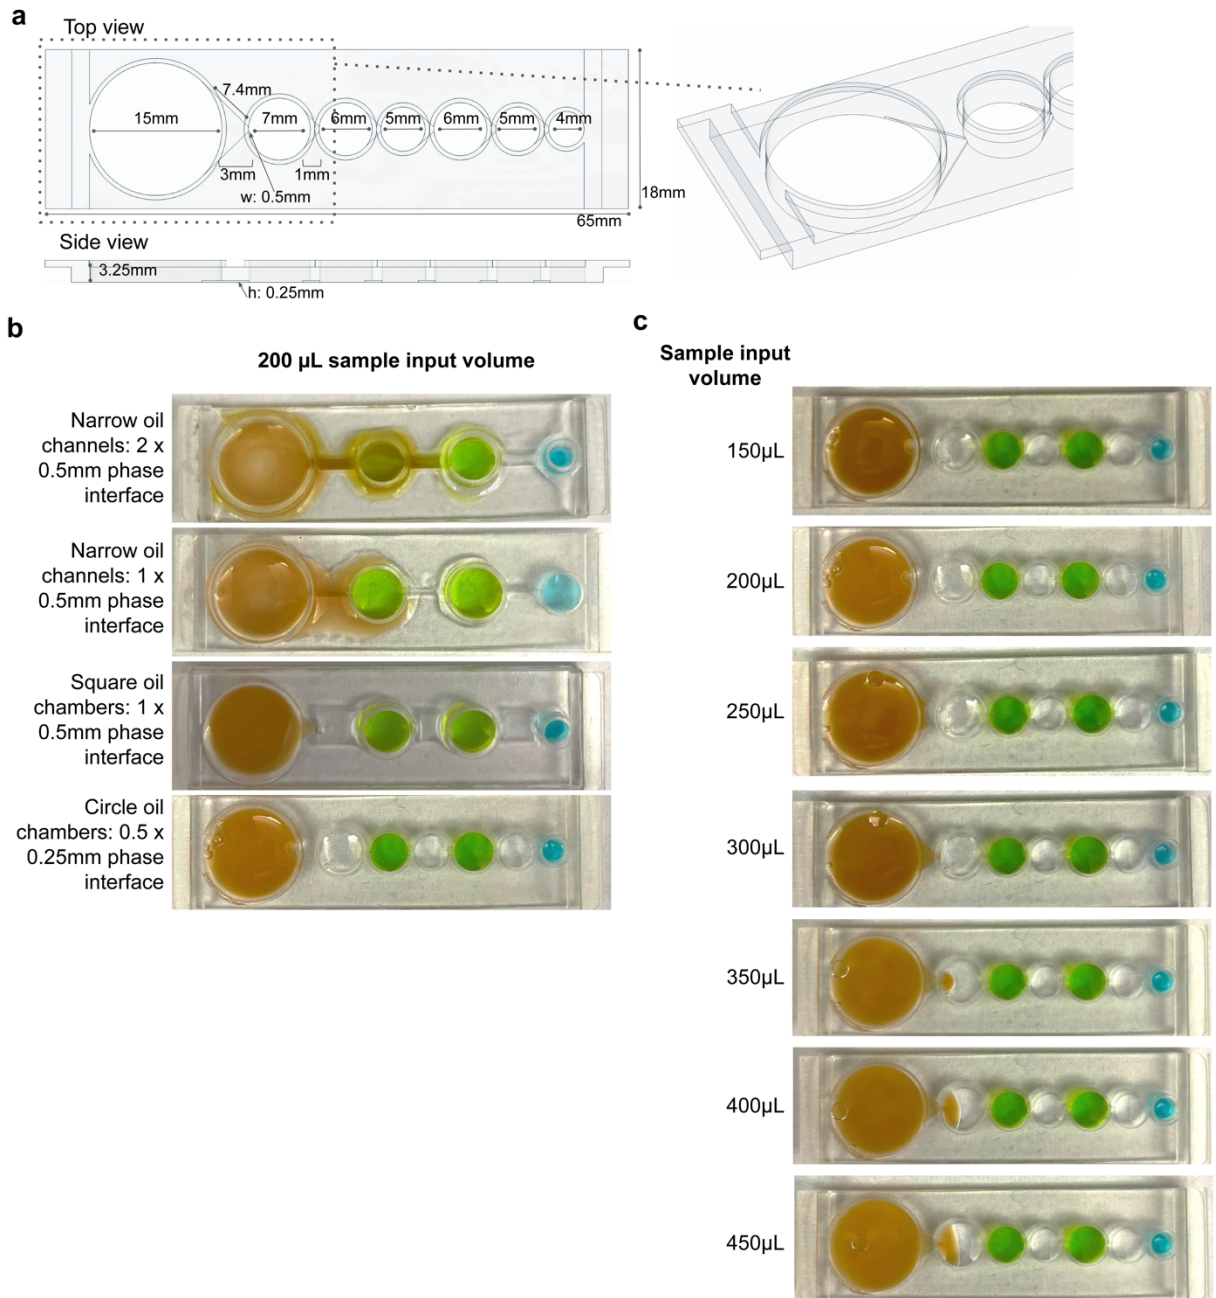

59  
 60 **Supplemental Figure 4. Fluidic characterization in nucleic-acid extraction module**  
 61 **containing different geometries of microchannels and chambers. (a)** Schematic of  
 62 oil/reagent interface design. Design includes triangular narrowing between chambers to help  
 63 guide beads into the next chamber. Interface between phases has 0.5 mm width and 0.25mm  
 64 height; this design was found to be most tolerant of containing larger volumes without breaking  
 65 the barrier between lysis chamber reagent mix and the mineral oil. Chamber dimensions (shown  
 66 in figure) varied depending on necessary volume of reagents for each step in extraction protocol.  
 67 **(b)** Images of extraction module with various oil channel geometries at 200  $\mu\text{L}$  of sample input  
 68 volume: lysis chamber contains brown-colored liquid (due to magnetic beads in suspension),  
 69 wash chambers are indicated with green dye, and elution chamber indicated with blue dye;

70 mineral oil is transparent. Earlier design iterations revealed that increasing volumes of liquid in  
71 the lysis/binding chamber resulted in leakage of reagents into the oil phase, owing to the  
72 significantly lower surface tension of lysis buffers containing detergents compared to water (1).  
73 As discussed by previous studies utilizing immiscible phase separation (2), the separation of the  
74 aqueous and oil phases during device loading relies upon the dominance of surface tension over  
75 gravity. This relationship can be quantified using Bond number ( $Bo = \rho g L^2 / \gamma$ ), and  $Bo \ll 1$  indicates  
76 that surface tension forces dominate the effects of gravity; the  $L^2$  term (characteristic length, or  
77 phase interface area at the barrier between oil and reagent in this case) dominates this  
78 relationship, thus we aimed to minimize  $L$  in order to minimize  $Bo$ . Experimentally, observations  
79 demonstrated phase interface influenced how well the barrier was maintained without leaking for  
80 the lysis chamber. We first tested decreasing sizes of phase interfaces, and found that smaller  
81 interfaces better maintained the barrier (module design with larger interface  $2 \times 0.5\text{mm}$  (top  
82 image) leaked more severely than  $1 \times 0.5\text{mm}$  design (second to top image), when adding  $200\mu\text{L}$   
83 sample volume). Additionally, oil volume held in the oil chamber appeared to be important in  
84 maintaining the interface. Square oil chambers holding  $100\mu\text{L}$  oil, compared to  $20\text{-}30\mu\text{L}$  oil in  
85 previous, with  $1 \times 0.5\text{mm}$  interface (second to bottom image) did not leak at  $200\mu\text{L}$  sample volume,  
86 yet began to show signs of encroachment of the oil barrier at this sample volume, likely indicating  
87 that  $200\mu\text{L}$  approaches the lysis chamber's volume capacity for that geometry with a larger phase  
88 interface. Thus, combining the concepts of minimizing phase interface and increasing oil volume,  
89 we created a circular oil chamber design to hold  $100\mu\text{L}$  oil with a  $0.5 \times 0.25\text{mm}$  phase interface  
90 (bottom image) that could accommodate  $200\mu\text{L}$  without leaking or signs of encroachment into  
91 the oil. **(c)** Images of extraction module design chosen in (b) tested for tolerance of various input  
92 sample volumes. The lysis/binding chamber can accommodate a sample volume of up to  $300\mu\text{L}$   
93 without leaking into the first oil chamber, which is well within the expected yield of the filter ( $200\mu\text{L}$   
94 average yield, see Fig. 2f). Sample volumes up to  $450\mu\text{L}$  can be added without leaking into  
95 subsequent reagent chambers.



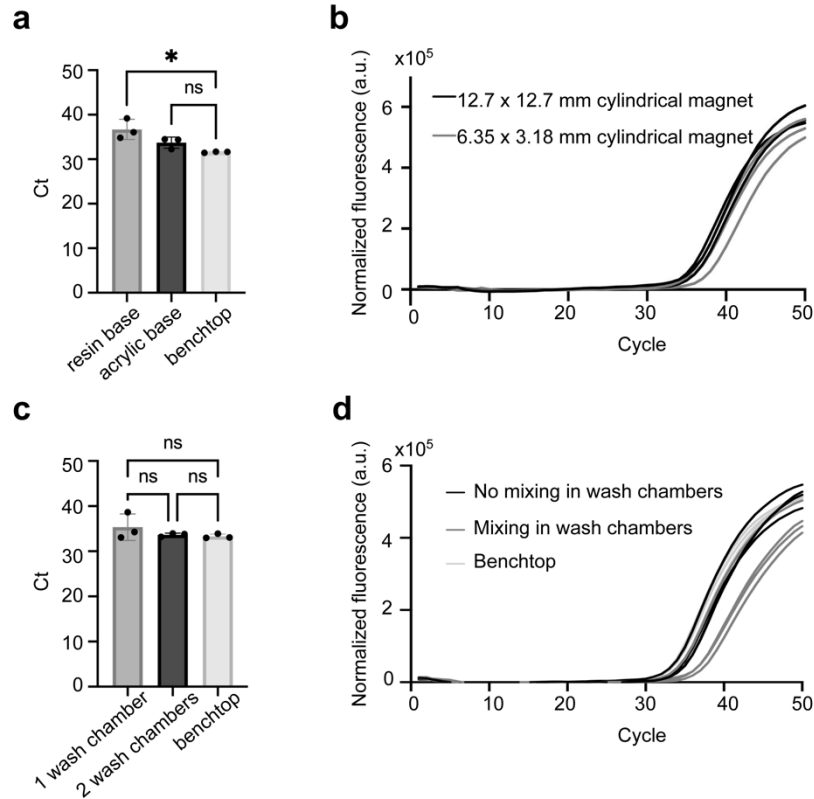

96  
 97  
 98  
 99  
 100  
 101  
 102  
 103  
 104  
 105  
 106  
 107  
 108  
 109  
 110  
 111  
 112  
 113  
 114

**Supplemental Figure 5. Optimization of on-cartridge nucleic acid extraction.** (a) Evaluation of the effect of various bottom surfaces on cartridge RNA extraction performance by PCR  $C_t$ . There is higher variability in RNA extraction performance on cartridges with 3D-printed resin bases, likely due to variable surface roughness during DLP 3D-printing and post-processing. Cartridges with acrylic (PMMA) bases show similar performance to benchtop RNA extraction ( $p=0.2677$ ) while there is a significant difference in  $C_t$  between benchtop extraction and cartridge extraction with a resin base ( $p=0.0139$ ). (b) PCR amplification curves of cartridge-extracted RNA using various magnet sizes. The 12.7 x 12.7 mm cylindrical magnet demonstrated slightly earlier amplification than the smaller 6.35 x 3.18 mm cylindrical magnet, potentially due to decreased magnetic bead loss due to stronger magnetic field. (c) Evaluation of the effect of number of wash chambers on RNA extraction performance. There was no significant difference in cartridges with one wash chamber vs. two wash chambers ( $p = 0.4999$ ), but there was more variability in  $C_t$  in cartridges with only one wash chamber. (d) PCR amplification curves of cartridge-extracted RNA with and without on-cartridge mixing in the wash chambers. Mixing in the wash chambers resulted in delayed amplification compared to cartridge extraction runs where there was no mixing, which was similar in performance to benchtop RNA extraction.

115 **SUPPLEMENTAL REFERENCES**

- 116 1. Snyder SA, Boban M, Li C, VanEpps JS, Mehta G, Tuteja A. Lysis and direct detection of  
117 coliforms on printed paper-based microfluidic devices. Lab Chip. 2020 Nov  
118 24;20(23):4413–9.
- 119 2. Berry SM, Alarid ET, Beebe DJ. One-step purification of nucleic acid for gene expression  
120 analysis via Immiscible Filtration Assisted by Surface Tension (IFAST). Lab Chip. 2011 May  
121 21;11(10):1747–53.
